# Supplementary material for: Aggregation-induced emission enhancement (AIEE) of tetrarhenium(i) metallacycles and their application as luminescent sensors for nitroaromatics and antibiotics
Source: Royal Society of Chemistry journal article supplement (doi:10.1039/d2dt03408e), 2023-01-01
Supplement: d2dt03408e1.pdf [file d2dt03408e1.pdf]

Supporting Information for

**Aggregation-induced emission enhancement (AIEE) of tetrarhenium(I)  
metallacycles and their application as luminescent sensors for  
nitroaromatics and antibiotics**

Mohammad Nurnabi,<sup>a</sup> Shunmugasundaram Gurusamy,<sup>b</sup> Jing-Yun Wu,<sup>c</sup> Chung-Chou Lee,<sup>a</sup>  
Malaichamy Sathiyendiran,<sup>a</sup> Sheng-Ming Huang,<sup>a</sup> Che-Hao Chang,<sup>a</sup> Ito Chao,<sup>a</sup> Gene-Hsiang  
Lee,<sup>d</sup> Shie-Ming Peng,<sup>d</sup> Veerasamy Sathish,<sup>e</sup> Pounraj Thanasekaran,<sup>\*,f</sup> and Kuang-Lieh  
Lu<sup>\*,a,g</sup>

<sup>a</sup>*Institute of Chemistry, Academia Sinica, Taipei 115, Taiwan*

<sup>b</sup>*PG and Research Department of Chemistry, V. O. Chidambaram College, Tuticorin – 628  
008, Tamil Nadu, India*

<sup>c</sup>*Department of Applied Chemistry, National Chi Nan University, Nantou 545, Taiwan*

<sup>d</sup>*Department of Chemistry, National Taiwan University, Taipei 107, Taiwan*

<sup>e</sup>*Department of Chemistry, Bannari Amman Institute of Technology, Sathyamangalam – 638  
401, India*

<sup>f</sup>*Department of Chemistry, Pondicherry University, Puducherry 605 014, India*

<sup>g</sup>*Department of Chemistry, Fu Jen Catholic University, New Taipei City 242, Taiwan*

\*To whom correspondence should be addressed.

E-mail: [ptsekaran.chem@pondiuni.edu.in](mailto:ptsekaran.chem@pondiuni.edu.in) (P. Thanasekaran)

E-mail: [kllu@gate.sinica.edu.tw](mailto:kllu@gate.sinica.edu.tw) (K.-L. Lu)

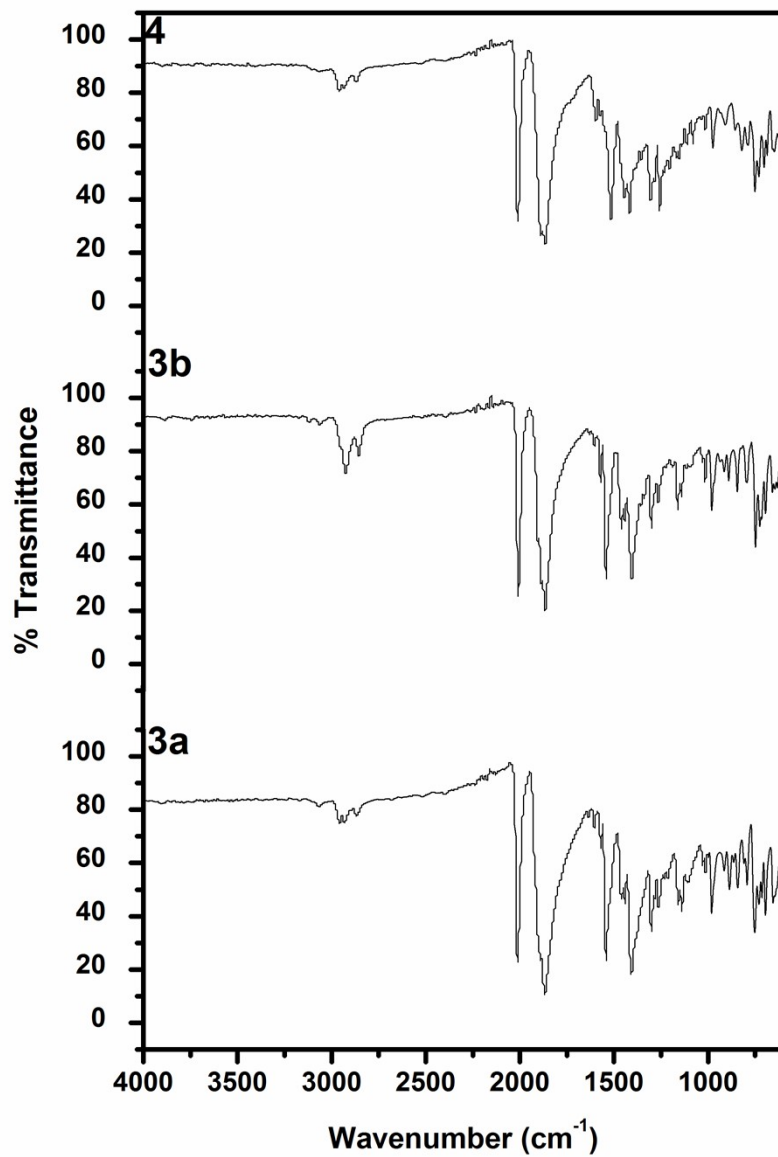

**Figure S1.** ATR-IR spectra of compounds **3a**, **3b** and **4**.

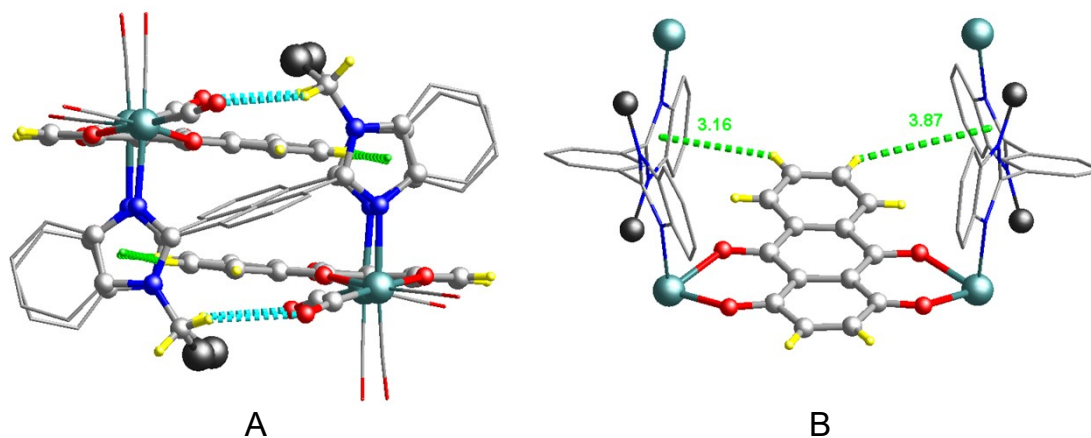

**Figure S2.** (A) Side view of the molecular structure of **3a**, showing potential C–H···π (green dashed lines) and C–H···O=C (cyan dashed lines) interactions. Color scheme: teal, Re; red, O; blue, N; gray, C; yellow, H; dark gray, C<sub>3</sub>H<sub>7</sub> group. (B) Highlight of potential C–H···π (green dashed lines) interactions in **3a**. Color scheme: teal, Re; red, O; blue, N; gray, C; yellow, H; dark gray, C<sub>4</sub>H<sub>9</sub> groups.

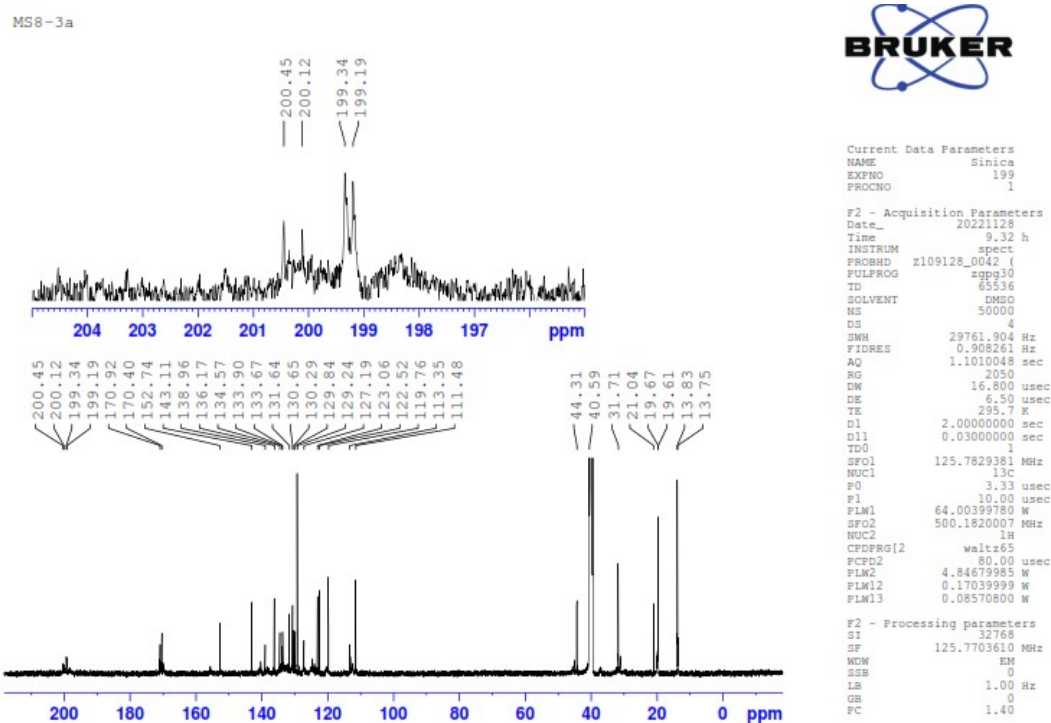

**Figure S3.** <sup>13</sup>C NMR spectrum of compound **3a**.

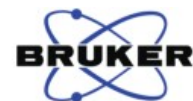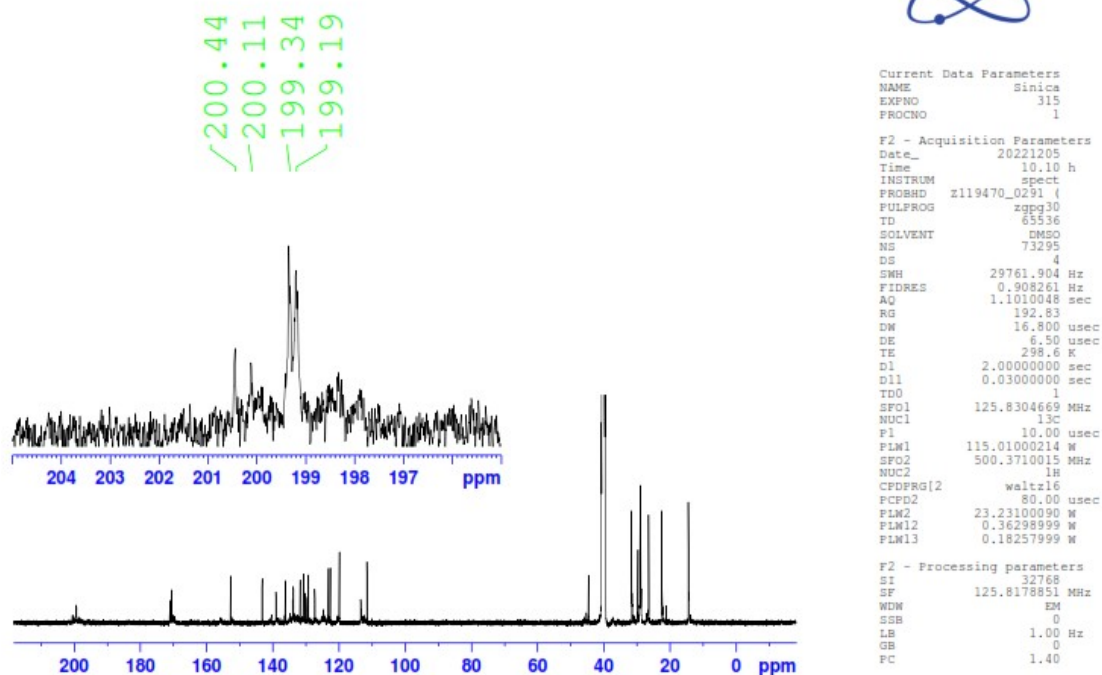

**Figure S4.**  $^{13}\text{C}$  NMR spectrum of compound **3b**.

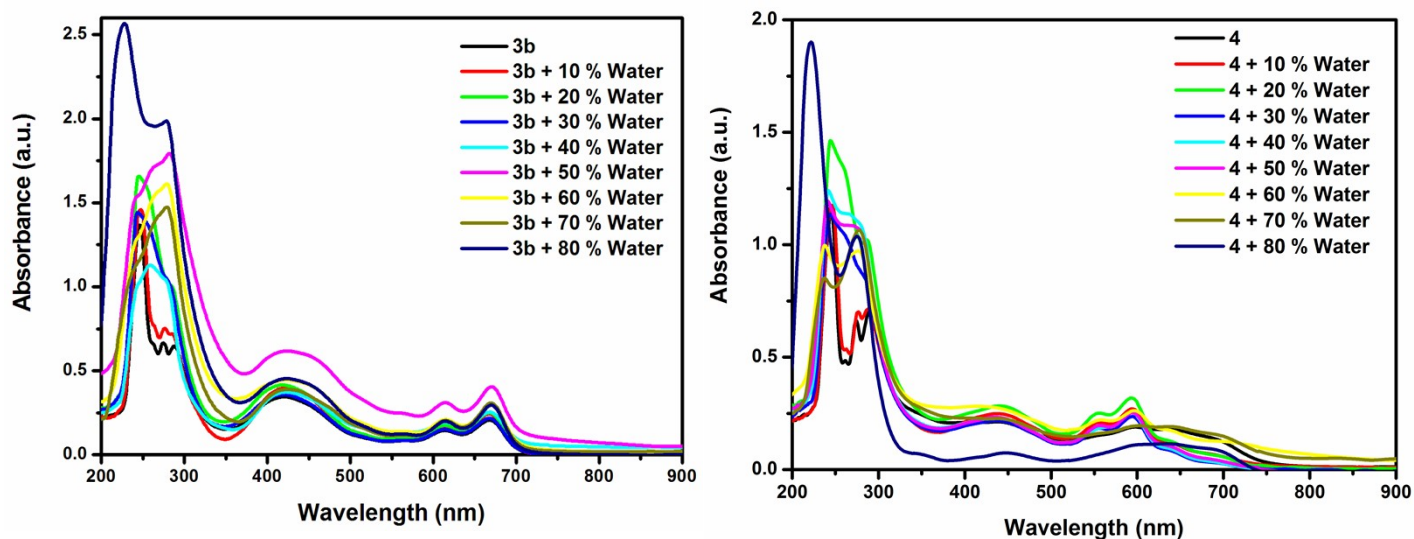

**Figure S5.** UV-visible spectral changes for compounds **3b** and **4** (10  $\mu\text{M}$ ) upon the addition of various water content (0–90%) in  $\text{H}_2\text{O}$ :THF mixture.

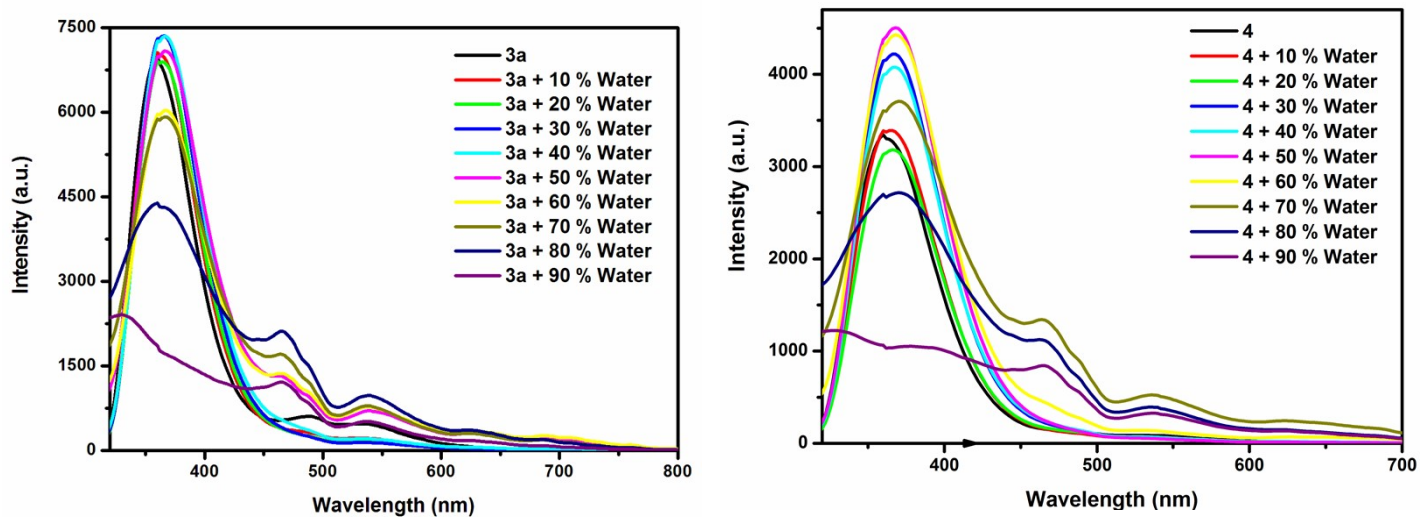

**Figure S6.** Changes in the fluorescence spectra of **3a** and **4** (10  $\mu$ M) upon the addition of water (10–90%) to a H<sub>2</sub>O:THF mixture ( $\lambda_{\text{ex}} = 320$  nm)

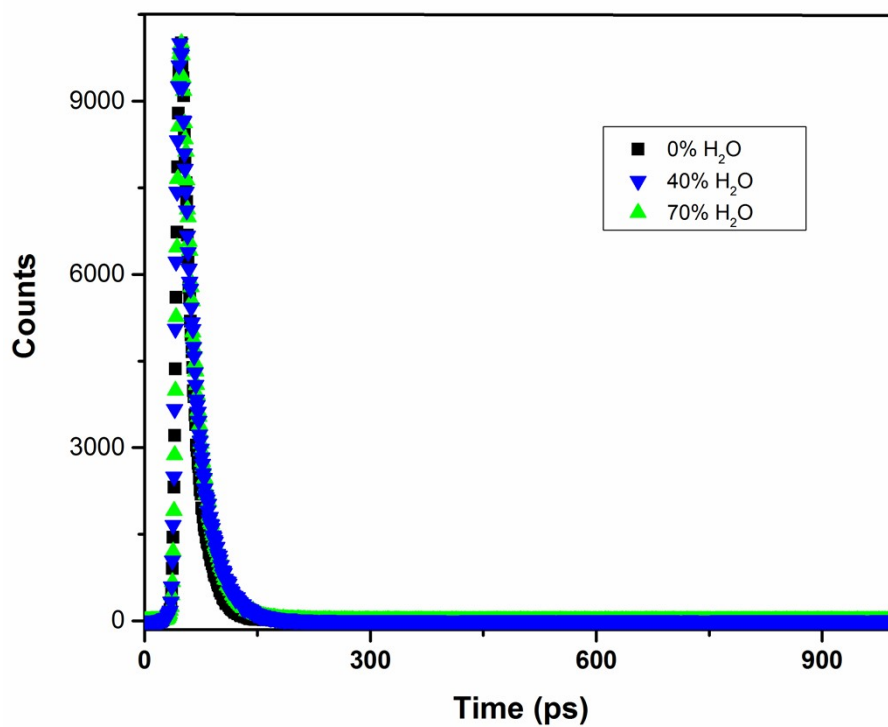

**Figure S7.** Life-time decay profile of compound **3b** in the presence of different water contents (0, 40 & 70%) in THF.

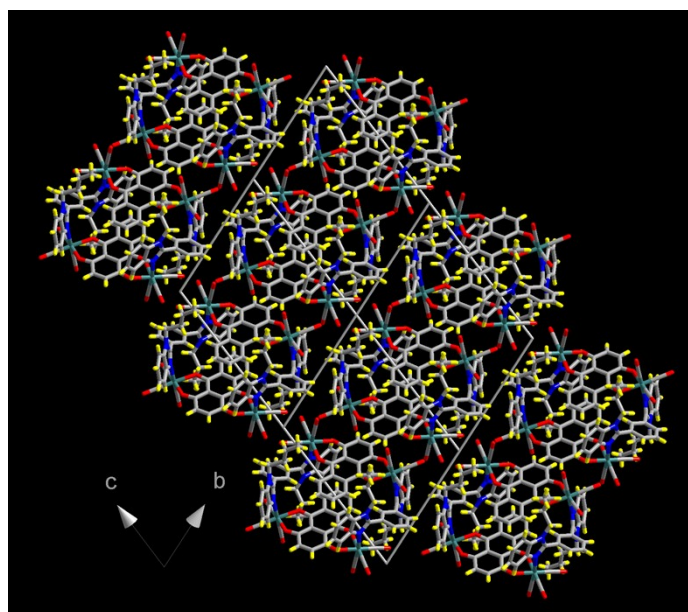

**Figure S8.** Crystal packing diagram of **3a** viewed along the crystallographic *a*-axis.

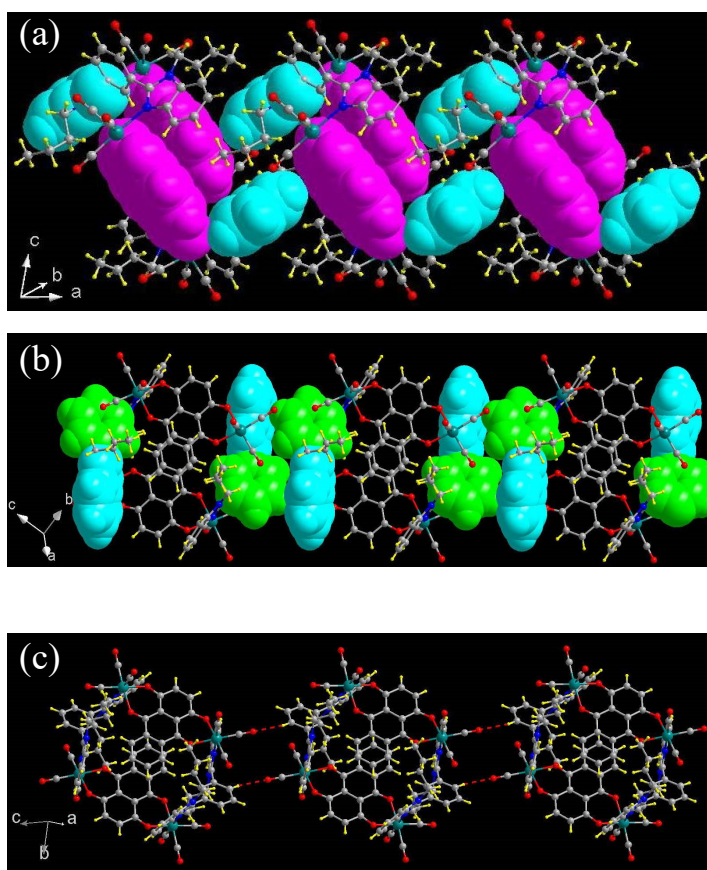

**Figure S9.** (a) Highlights of the column-stacking of the tetrarhenium compound **3a** along the crystallographic *a*-axis, assisted by C–H $\cdots$  $\pi$  interactions between the phenyl ring of the benzimidazolyl moiety of **1a** (cyan-colored space-filling model) and the dhaq ligand (pink-colored space-filling model). (b) Highlights the C–H $\cdots$  $\pi$  interactions between the central benzene ring and the benzimidazolyl moiety of **1a** (cyan) in neighboring molecules of **3a**. (c)



The C–H $\cdots$ O=C hydrogen bonds between the central benzene ring of **1a** in a molecule and the carbonyl groups of neighboring molecules.

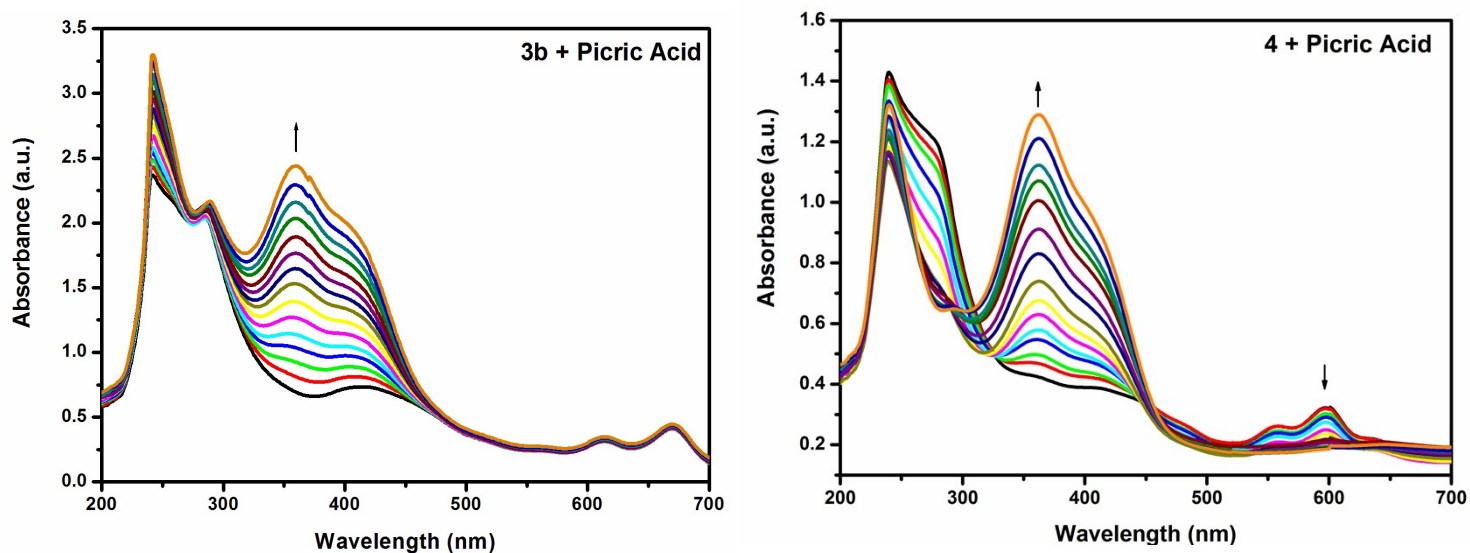

**Figure S10.** Changes in the absorption spectra of **3b** and **4** (10  $\mu$ M) upon the addition of PA (0–15  $\mu$ M) in 50:50 H<sub>2</sub>O:THF mixture.

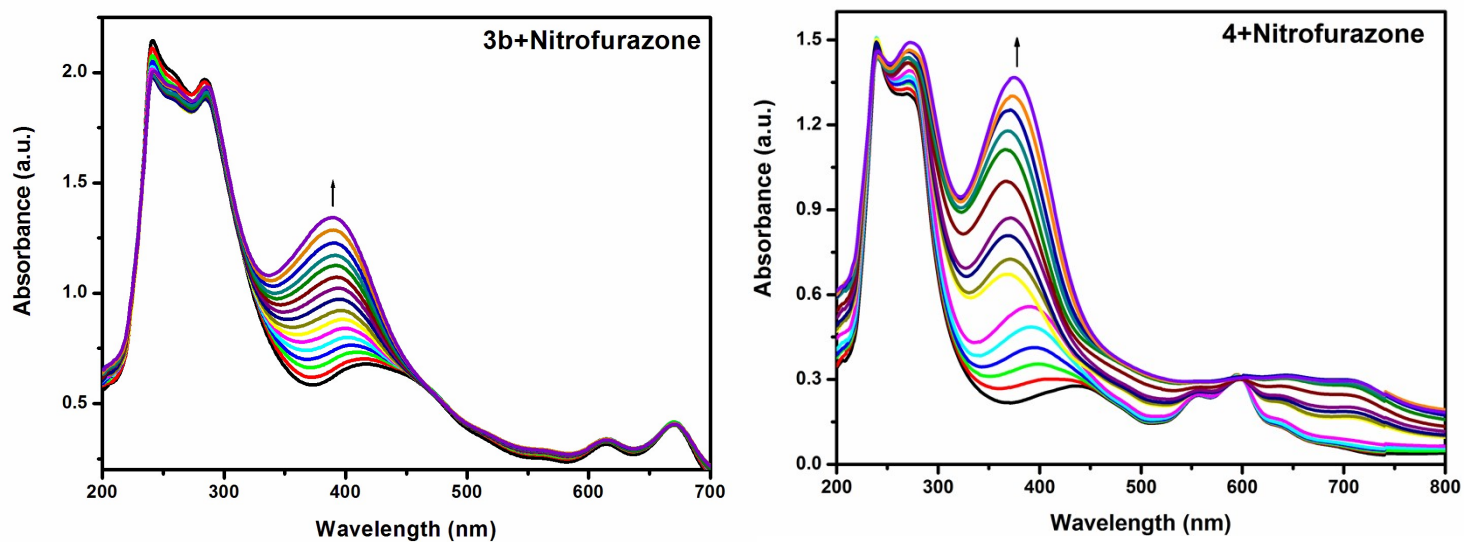

**Figure S11.** Changes in the absorption spectra of **3b** and **4** (10  $\mu$ M) upon the addition of nitrofurazone (0–15  $\mu$ M) to a 50:50 H<sub>2</sub>O:THF mixture.

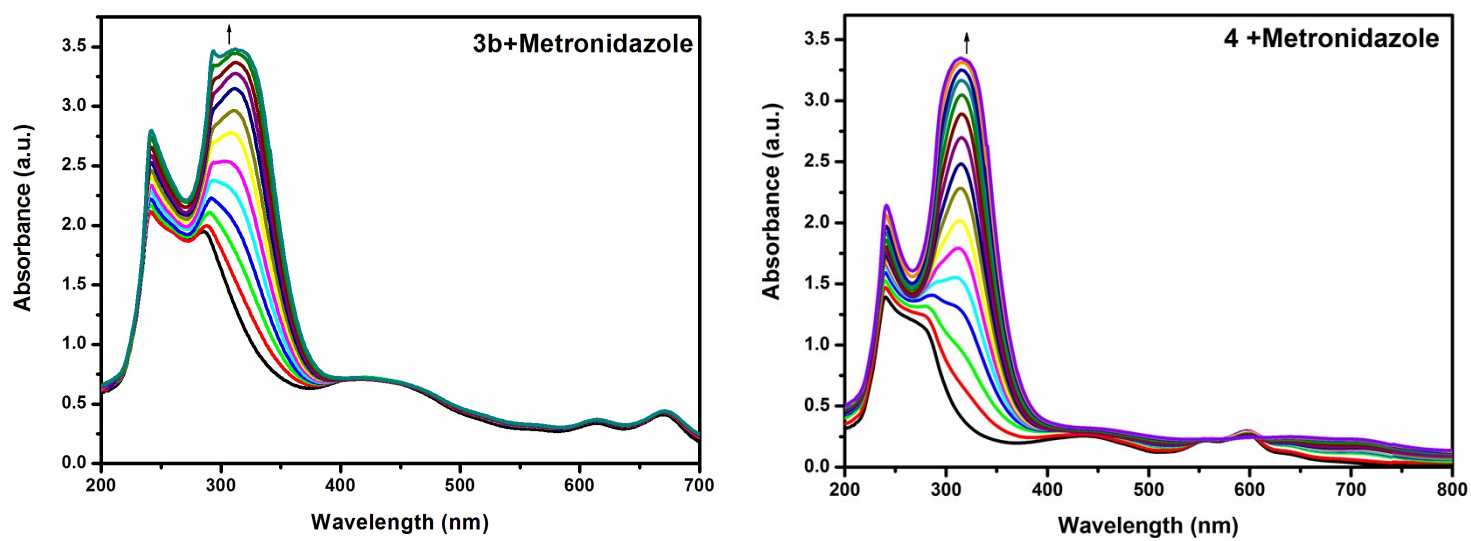

**Figure S12.** Changes in the absorption spectra of **3b** and **4** (10  $\mu\text{M}$ ) upon the addition of metronidazole (0–15  $\mu\text{M}$ ) to a 50:50  $\text{H}_2\text{O}$ :THF mixture.



**Table S1.** Crystallographic Data of **3a** and **4·3C<sub>7</sub>H<sub>8</sub>**

|                                                                         | <b>3a</b>                                                                      | <b>4·3C<sub>7</sub>H<sub>8</sub></b>                                            |
|-------------------------------------------------------------------------|--------------------------------------------------------------------------------|---------------------------------------------------------------------------------|
| formula                                                                 | C <sub>96</sub> H <sub>72</sub> N <sub>8</sub> O <sub>20</sub> Re <sub>4</sub> | C <sub>117</sub> H <sub>96</sub> N <sub>8</sub> O <sub>22</sub> Re <sub>4</sub> |
| <i>M<sub>r</sub></i>                                                    | 2402.42                                                                        | 2710.82                                                                         |
| crystal system                                                          | triclinic                                                                      | monoclinic                                                                      |
| space group                                                             | <i>P</i> $\bar{1}$                                                             | <i>P</i> 2 <sub>1</sub> / <i>n</i>                                              |
| <i>a</i> (Å)                                                            | 11.5803 (8)                                                                    | 15.7647 (9)                                                                     |
| <i>b</i> (Å)                                                            | 13.1966 (8)                                                                    | 14.9159 (8)                                                                     |
| <i>c</i> (Å)                                                            | 16.1427 (11)                                                                   | 22.4345 (13)                                                                    |
| $\alpha$ (deg)                                                          | 67.950 (2)                                                                     | 90                                                                              |
| $\beta$ (deg)                                                           | 79.118 (2)                                                                     | 90.631 (1)                                                                      |
| $\gamma$ (deg)                                                          | 70.650 (2)                                                                     | 90                                                                              |
| <i>V</i> (Å <sup>3</sup> )                                              | 2151.5 (2)                                                                     | 5275.0 (5)                                                                      |
| <i>Z</i>                                                                | 1                                                                              | 2                                                                               |
| <i>T</i> (K)                                                            | 296(2)                                                                         | 150 (2)                                                                         |
| $\lambda$ (Å)                                                           | 0.71073                                                                        | 0.71073                                                                         |
| <i>D<sub>calc</sub></i> (g/cm <sup>3</sup> )                            | 1.854                                                                          | 1.707                                                                           |
| $\mu$ (mm <sup>-1</sup> )                                               | 5.687                                                                          | 4.651                                                                           |
| <i>F</i> (000)                                                          | 1164                                                                           | 2660                                                                            |
| goodness-of-fit                                                         | 1.042                                                                          | 1.201                                                                           |
| R1 <sup>a</sup> /wR2 <sup>b</sup> [ <i>I</i> > 2 $\sigma$ ( <i>I</i> )] | 0.0333/0.0800                                                                  | 0.0840/0.1780                                                                   |
| R1 <sup>a</sup> /wR2 <sup>b</sup> (all data)                            | 0.0503/0.0874                                                                  | 0.0968/0.1855                                                                   |
| largest residuals (e Å <sup>-3</sup> )                                  | 1.017/−1.982                                                                   | 6.361/−3.663                                                                    |

$$^a R_1 = \sum \|F_o\| - \|F_c\| / \sum \|F_o\|, \quad ^b wR_2 = \{ \sum [w(F_o^2 - F_c^2)^2] / \sum [w(F_o^2)^2] \}^{1/2}$$

**Table S2.** Stern-Volmer quenching constant values (*K<sub>sv</sub>*, M<sup>-1</sup>) for the reaction of metallacycles **3b** and **4** by PA and antibiotics.

| Compounds | Nitroaromatics & Antibiotics | SV Quenching constant                    |
|-----------|------------------------------|------------------------------------------|
|           |                              | <i>K<sub>sv</sub></i> (M <sup>-1</sup> ) |
| <b>3b</b> | Picric acid                  | 2.6591 × 10 <sup>4</sup>                 |
| <b>3b</b> | Metronidazole                | 3.8889 × 10 <sup>4</sup>                 |
| <b>3b</b> | Nitrofurazone                | 5.9368 × 10 <sup>4</sup>                 |
| <b>4</b>  | Picric acid                  | 4.3853 × 10 <sup>4</sup>                 |
| <b>4</b>  | Metronidazole                | 2.6643 × 10 <sup>4</sup>                 |
| <b>4</b>  | Nitrofurazone                | 3.1772 × 10 <sup>4</sup>                 |
